# Supplementary material
Source: HighWire-hosted journal article supplement (https://gut.bmj.com/content/66/4/633)
Supplement: inline-supplementary-material-4 [file inline-supplementary-material-4.pdf]

**Supplementary Table 4: Wilcoxon test (genera) between CRC patients (tumor sample if available, otherwise noncancerous tissue) and controls**

|                                    | <b>padjust</b> | <b>mean CRC [%]</b> | <b>mean HC [%]</b> | <b>ratio</b> |
|------------------------------------|----------------|---------------------|--------------------|--------------|
| Acetanaerobacterium                | 0.024568617    | 0.179964604         | 0.141418515        | 1.272567483  |
| Actinomyces                        | 0.252291447    | 0.041096889         | 0.012919716        | 3.180943656  |
| Akkermansia                        | 0.125284184    | 2.571869842         | 2.024205263        | 1.270557828  |
| Alistipes                          | 0.149711837    | 1.345591696         | 1.23261076         | 1.091659865  |
| Anaerorhabdus                      | 0.006305443    | 0.005302824         | 0.025839432        | 0.205222171  |
| Anaerostipes                       | 1.71E-06       | 0.686715762         | 8.591262082        | 0.079931884  |
| Anaerotruncus                      | 0.519874034    | 0.062639613         | 0.039457512        | 1.587520624  |
| Bacteroides                        | 0.252291447    | 16.2551454          | 16.57459914        | 0.980726307  |
| Barnesiella                        | 0.222435546    | 0.613139073         | 0.917649031        | 0.668162939  |
| Bifidobacterium                    | 0.031534783    | 1.504676428         | 0.42076373         | 3.576060201  |
| Bilophila                          | 0.519874034    | 0.130582051         | 0.147005419        | 0.888280527  |
| Blautia                            | 8.08E-05       | 5.370766855         | 12.96720487        | 0.414180767  |
| Butyricicoccus                     | 0.02669232     | 0.111690739         | 0.195890832        | 0.570168283  |
| Butyricimonas                      | 0.252291447    | 0.108045047         | 0.066344489        | 1.628545941  |
| Campylobacter                      | 0.014306984    | 0.118982123         | 0.002095089        | 56.79096045  |
| Catenibacterium                    | 0.846305431    | 0.180958883         | 0.046790323        | 3.867442449  |
| Clostridium_IV                     | 0.017903482    | 0.810669283         | 0.226269624        | 3.582757899  |
| Clostridium_sensu_stricto          | 0.067288192    | 1.106301744         | 0.713727024        | 1.550034827  |
| Clostridium_XI                     | 0.582965503    | 0.862040394         | 1.161726912        | 0.742033593  |
| Clostridium_XIVa                   | 0.000585905    | 1.931553794         | 3.395441086        | 0.568866826  |
| Clostridium_XIVb                   | 0.113352833    | 0.246581335         | 0.362799598        | 0.679662648  |
| Clostridium_XVIII                  | 0.018934691    | 0.180627457         | 0.329278172        | 0.548555817  |
| Collinsella                        | 0.492871067    | 0.144501965         | 0.126054528        | 1.146344899  |
| Coprococcus                        | 2.61E-05       | 1.568973174         | 4.319375384        | 0.363240755  |
| Desulfovibrio                      | 0.802935856    | 0.26712978          | 0.274456674        | 0.973304007  |
| Dialister                          | 0.364224708    | 0.461677151         | 0.241633611        | 1.910649554  |
| Dorea                              | 0.002028059    | 0.699641396         | 1.059416727        | 0.660402445  |
| Eggerthella                        | 0.802935856    | 0.015577047         | 0.008380356        | 1.858757062  |
| Erysipelotrichaceae_incertae_sedis | 0.252291447    | 0.163724704         | 0.434730991        | 0.376611531  |
| Escherichia_Shigella               | 0.023680008    | 4.35991595          | 1.041259288        | 4.187156839  |
| Eubacterium                        | 0.00680344     | 0.123290668         | 0.019903347        | 6.194469224  |
| Faecalibacterium                   | 0.000990097    | 6.479720011         | 10.48312755        | 0.618109432  |
| Flavonifractor                     | 0.317588028    | 0.359597781         | 0.357561875        | 1.005693856  |
| Fusobacterium                      | 0.001720535    | 2.59970967          | 0.005936086        | 437.9501496  |
| Gemella                            | 0.228489634    | 0.238958525         | 0.008031175        | 29.75386883  |
| Gemmiger                           | 0.113352833    | 1.775120474         | 1.927481982        | 0.920953083  |
| Granulicatella                     | 0.046467783    | 0.495482656         | 0.005237723        | 94.59887006  |
| Haemophilus                        | 0.563243052    | 1.002565241         | 0.197636739        | 5.072767563  |
| Halomonas                          | 0.654096317    | 2.080032878         | 0.16795631         | 12.38436872  |
| Holdemanina                        | 0.091281406    | 0.028171255         | 0.021998436        | 1.280602637  |
| Howardella                         | 0.014306984    | 0.06197676          | 0.036314878        | 1.706649283  |
| Klebsiella                         | 0.036270934    | 0.480568463         | 0.690331862        | 0.696141217  |
| Lachnospiracea_incertae_sedis      | 4.92E-06       | 5.623645294         | 11.94480139        | 0.470802746  |
| Lactobacillus                      | 0.073804206    | 0.173004647         | 0.047488687        | 3.643070788  |
| Mogibacterium                      | 0.010021641    | 0.027839828         | 0.006634449        | 4.196253345  |
| Odoribacter                        | 0.560381334    | 0.29099249          | 0.178082574        | 1.63403124   |

|                                 |             |             |             |             |
|---------------------------------|-------------|-------------|-------------|-------------|
| Oscillibacter                   | 0.008009787 | 1.120553085 | 0.571959327 | 1.959148196 |
| Parabacteroides                 | 0.486481137 | 0.673127274 | 0.89669814  | 0.750673214 |
| Paraprevotella                  | 0.519874034 | 0.115999284 | 0.104754456 | 1.107344633 |
| Parasutterella                  | 0.843225751 | 0.295632461 | 0.20008101  | 1.477563818 |
| Parvimonas                      | 0.014306984 | 0.498465495 | 0.008380356 | 59.48022599 |
| Peptococcus                     | 0.519874034 | 0.036456918 | 0.025490251 | 1.430229858 |
| Peptostreptococcus              | 0.001377127 | 0.478248477 | 0.004190178 | 114.1355932 |
| Phascolarctobacterium           | 0.010021641 | 0.533596707 | 0.173194033 | 3.080918535 |
| Porphyromonas                   | 0.030570163 | 0.894188767 | 0.003142634 | 284.5348399 |
| Prevotella                      | 0.013704669 | 7.938328152 | 2.305645567 | 3.442995865 |
| Pseudoflavonifractor            | 0.435744052 | 0.0324798   | 0.027236158 | 1.192524989 |
| Roseburia                       | 0.519874034 | 4.593571651 | 4.30226549  | 1.067709945 |
| Ruminococcus                    | 0.014306984 | 1.564001776 | 0.340801162 | 4.589191442 |
| Shewanella                      | 0.846305431 | 1.181866992 | 0.074026482 | 15.9654621  |
| Slackia                         | 0.822384708 | 0.006959957 | 0.015363987 | 0.453004622 |
| Sporobacter                     | 0.322912772 | 0.217747228 | 0.131641432 | 1.654093423 |
| Streptococcus                   | 2.61E-05    | 3.622823356 | 0.456380245 | 7.938168662 |
| Sutterella                      | 0.665583664 | 1.033387908 | 0.781468238 | 1.322367126 |
| Turicibacter                    | 0.889780778 | 0.073908115 | 0.086597017 | 0.853471843 |
| unclassified.Bacteroidetes      | 0.046585853 | 0.135884876 | 0.053773954 | 2.526964561 |
| unclassified.Clostridiales      | 0.000990097 | 1.419168385 | 0.352673334 | 4.024030878 |
| unclassified.Coriobacteriaceae  | 0.519874034 | 0.044742581 | 0.039457512 | 1.133943303 |
| unclassified.Firmicutes         | 0.758417708 | 0.175987485 | 0.189256383 | 0.929889299 |
| unclassified.Lachnospiraceae    | 0.036270934 | 2.708086144 | 3.421978882 | 0.791380145 |
| unclassified.Porphyromonadaceae | 0.046467783 | 0.079542366 | 0.010475446 | 7.593220339 |
| unclassified.Rhodospirillaceae  | 0.322912772 | 0.081530925 | 0.140720152 | 0.579383438 |
| unclassified.Rhodospirillales   | 0.812410986 | 0.131907757 | 0.052726409 | 2.501739814 |
| unclassified.Ruminococcaceae    | 0.017903482 | 1.841737205 | 1.027292027 | 1.792807844 |
| Veillonella                     | 0.846305431 | 0.074570968 | 0.038759149 | 1.923957856 |
| Victivallis                     | 0.014306984 | 0.019885592 | 0.004888541 | 4.06779661  |
