# Supplementary material
Source: HighWire-hosted journal article supplement (https://gut.bmj.com/content/66/4/633)
Supplement: inline-supplementary-material-10 [file inline-supplementary-material-10.pdf]

## Supplementary table 10a-b:

## a) Spearman-rank correlation between mucosal and faecal abundance of OTUs

| OTU_ID   | p-value     | rho          | p-adjust | bacterial cluster     | Mean mucosa [%] | Mean stool [%] | ratio       | Genus                            |
|----------|-------------|--------------|----------|-----------------------|-----------------|----------------|-------------|----------------------------------|
| OTU_1    | 0.00500748  | 0.34984851   | 0.02     | Firmicutes Cluster 1  | 3.190384239     | 3.470253226    | 0.919351999 | Blautia                          |
| OTU_10   | 0.024066831 | 0.281947842  | 0.05     | Firmicutes Cluster 1  | 4.56            | 3.570468322    | 1.276570255 | Roseburia                        |
| OTU_100  | 0.931358986 | 0.014608446  | 0.95     | Prevotella Cluster    | 0.02            | 0.004888541    | 4.375       | Granulicatella                   |
| OTU_101  | 0.000251314 | 0.535825881  | 0.00     | Bacteroides Cluster 2 | 0.31            | 0.122824599    | 2.492537313 | Parasutterella                   |
| OTU_1010 | 0.008907698 | 0.40564437   | 0.03     | Bacteroides Cluster 2 | 0.10            | 0.098381893    | 1.031055901 | Bifidobacterium                  |
| OTU_1011 | 1.79E-01    | 0.181342967  | 0.27     | Bacteroides Cluster 2 | 0.09            | 0.163766132    | 0.529850746 | unclassified.Ruminococcaceae     |
| OTU_1016 | 2.02E-05    | 0.6928209    | 0.00     | Bacteroides Cluster 1 | 0.02            | 0.025664842    | 0.785714286 | Barnesiella                      |
| OTU_103  | 0.001918715 | 0.404756393  | 0.01     | Firmicutes Cluster 2  | 0.15            | 0.223650763    | 0.672131148 | unclassified.Firmicutes          |
| OTU_1039 | 0.569765026 | -0.083949672 | 0.68     | Firmicutes Cluster 1  | 0.03            | 0.048274345    | 0.683544304 | Blautia                          |
| OTU_104  | 0.001437671 | 0.537931034  | 0.01     | Bacteroides Cluster 2 | 0.13            | 0.22426183     | 0.561307902 | unclassified.Clostridiales       |
| OTU_1040 | 0.680789121 | -0.065306183 | 0.76     | Firmicutes Cluster 1  | 0.01            | 0.027498045    | 0.244444444 | Lachnospiraceae_incertae_sedis   |
| OTU_105  | 0.014099094 | 0.388393804  | 0.04     | Pathogen Cluster      | 0.40            | 0.143600899    | 2.791489362 | Peptostreptococcus               |
| OTU_106  | 0.049598331 | 0.260128088  | 0.10     | Firmicutes Cluster 1  | 0.11            | 0.122824599    | 0.895522388 | Butyrivibrio                     |
| OTU_1063 | 0.008799762 | 0.385295282  | 0.03     | Firmicutes Cluster 2  | 0.03            | 0.065384239    | 0.523364486 | unclassified.Ruminococcaceae     |
| OTU_1068 | 0.522607642 | 0.100753489  | 0.63     | Bacteroides Cluster 2 | 0.02            | 0.024442706    | 0.825       | Flavonifractor                   |
| OTU_107  | 0.247025627 | 0.165750542  | 0.35     | Bacteroides Cluster 2 | 0.07            | 0.056829292    | 1.161290323 | Oscillibacter                    |
| OTU_1078 | 0.086443254 | 0.26772786   | 0.15     | Prevotella Cluster    | 0.11            | 0.070272781    | 1.626086957 | Clostridium_sensu_stricto        |
| OTU_108  | 0.453899843 | 0.123396986  | 0.56     | Bacteroides Cluster 2 | 0.09            | 0.023831639    | 3.897435897 | Bifidobacterium                  |
| OTU_1080 | 0.831686039 | 0.036229982  | 0.87     | Firmicutes Cluster 2  | 0.00            | 0.009777083    | 0.25        | Faecalibacterium                 |
| OTU_1083 | 0.6443432   | -0.081431293 | 0.73     | Prevotella Cluster    | 0.00            | 0.003055338    | 0.8         | Cellulosilyticum                 |
| OTU_109  | 0.002929914 | 0.375386392  | 0.01     | Firmicutes Cluster 1  | 0.91            | 1.258799374    | 0.722330097 | Blautia                          |
| OTU_1090 | 0.002913706 | 0.51429655   | 0.01     | Firmicutes Cluster 2  | 0.03            | 0.017720962    | 1.620689655 | Coprococcus                      |
| OTU_11   | 0.030855348 | 0.288453333  | 0.06     | Bacteroides Cluster 1 | 0.45            | 0.656897732    | 0.681860465 | Lachnospiraceae_incertae_sedis   |
| OTU_110  | 0.367632799 | 0.15446644   | 0.49     | Bacteroides Cluster 1 | 0.01            | 0.005499609    | 2.444444444 | Clostridium_IV                   |
| OTU_1111 | 0.000517419 | 0.565983972  | 0.00     | Pathogen Cluster      | 0.08            | 0.041552601    | 1.852941176 | unclassified.Lachnospiraceae     |
| OTU_1117 | 0.68507464  | 0.070573585  | 0.76     | Bacteroides Cluster 2 | 0.00            | 0.004888541    | 0.75        | Asaccharobacter                  |
| OTU_112  | 0.326777338 | 0.143338567  | 0.44     | Bacteroides Cluster 1 | 0.08            | 0.037886195    | 1.983870968 | unclassified.Ruminococcaceae     |
| OTU_1129 | 8.04E-01    | 4.24E-02     | 0.85     | Firmicutes Cluster 2  | 0.01            | 0.00794388     | 0.769230769 | Lachnospiraceae_incertae_sedis   |
| OTU_113  | 0.01762967  | 0.309013587  | 0.04     | Firmicutes Cluster 1  | 0.40            | 0.347086429    | 1.146126761 | Lachnospiraceae_incertae_sedis   |
| OTU_114  | 0.035583574 | 0.302917663  | 0.07     | Prevotella Cluster    | 0.05            | 0.030553383    | 1.76        | Flavonifractor                   |
| OTU_115  | 3.89E-06    | 0.779310345  | 0.00     | Bacteroides Cluster 2 | 0.08            | 0.021998436    | 3.694444444 | Clostridium_IV                   |
| OTU_1157 | 2.38E-01    | 0.207575155  | 0.34     | Bacteroides Cluster 1 | 0.00            | 0.002444271    | 1.5         | Dorea                            |
| OTU_1159 | 7.25E-01    | 0.05615245   | 0.78     | Firmicutes Cluster 1  | 0.01            | 0.023220571    | 0.368421053 | Lachnospiraceae_incertae_sedis   |
| OTU_116  | 0.027507216 | 0.378539239  | 0.06     | Bacteroides Cluster 2 | 0.03            | 0.008554947    | 3.857142857 | Parabacteroides                  |
| OTU_1167 | 0.139068568 | 0.260010834  | 0.22     | Bacteroides Cluster 1 | 0.00            | 0.008554947    | 0.285714286 | Lachnospiraceae_incertae_sedis   |
| OTU_1172 | 0.071875798 | 0.310329376  | 0.13     | Bacteroides Cluster 2 | 0.01            | 0.009166015    | 1.2         | Butyrivibrio                     |
| OTU_1174 | 0.845362267 | -0.024590216 | 0.88     | Firmicutes Cluster 1  | 0.60            | 0.760779233    | 0.790361446 | Blautia                          |
| OTU_118  | 0.078706448 | 0.306186218  | 0.14     | Bacteroides Cluster 1 | 0.01            | 0.002444271    | 3.25        | Clostridium_XIVa                 |
| OTU_12   | 2.40E-01    | 0.174701094  | 0.34     | Firmicutes Cluster 1  | 0.05            | 0.024442706    | 2.025       | Coprococcus                      |
| OTU_120  | 1.79E-05    | 0.735316024  | 0.00     | Pathogen Cluster      | 0.30            | 0.006721744    | 44.81818182 | Anaerococcus                     |
| OTU_1200 | 0.003101511 | 0.493879918  | 0.01     | Prevotella Cluster    | 0.02            | 0.030553383    | 0.7         | Prevotella                       |
| OTU_1204 | 0.591557402 | 0.0925242    | 0.69     | Bacteroides Cluster 1 | 0.00            | 0.011610285    | 0.368421053 | Flavonifractor                   |
| OTU_121  | 0.007898045 | 0.463980364  | 0.02     | Bacteroides Cluster 2 | 0.13            | 0.012221353    | 10.3        | unclassified.Rhodospirillales    |
| OTU_122  | 0.002432119 | 0.487620654  | 0.01     | Bacteroides Cluster 1 | 0.16            | 0.079438795    | 2.061538462 | Bacteroides                      |
| OTU_1228 | 0.575340859 | 0.073613942  | 0.68     | Firmicutes Cluster 1  | 0.13            | 0.230983575    | 0.552910053 | unclassified.Lachnospiraceae     |
| OTU_1229 | 0.40501296  | 0.123706227  | 0.52     | Firmicutes Cluster 1  | 0.03            | 0.038497262    | 0.650793651 | Lachnospiraceae_incertae_sedis   |
| OTU_123  | 3.37E-08    | 0.88595223   | 0.00     | Prevotella Cluster    | 0.17            | 0.109992178    | 1.527777778 | Catenibacterium                  |
| OTU_1230 | 0.88465989  | 0.022388683  | 0.91     | Firmicutes Cluster 2  | 0.01            | 0.044607939    | 0.205479452 | Lachnospiraceae_incertae_sedis   |
| OTU_1232 | 0.132204887 | 0.231219622  | 0.22     | Firmicutes Cluster 2  | 0.02            | 0.045219007    | 0.405405405 | Lachnospiraceae_incertae_sedis   |
| OTU_125  | 0.014552158 | 0.402597892  | 0.04     | Prevotella Cluster    | 0.01            | 0.113047517    | 0.12972973  | unclassified.Clostridiales       |
| OTU_1250 | 4.99E-06    | 0.580363546  | 0.00     | Firmicutes Cluster 1  | 0.87            | 0.832885217    | 1.040352164 | Faecalibacterium                 |
| OTU_1256 | 0.305314122 | -0.178575984 | 0.42     | Bacteroides Cluster 1 | 0.00            | 0.003666406    | 1.166666667 | Lachnospiraceae_incertae_sedis   |
| OTU_126  | 0.006283115 | 0.479486239  | 0.02     | Bacteroides Cluster 2 | 0.03            | 0.000611068    | 51          | unclassified.Deltaproteobacteria |
| OTU_1262 | 0.363761292 | 0.130437299  | 0.48     | Firmicutes Cluster 1  | 0.03            | 0.101437231    | 0.337349398 | Lachnospiraceae_incertae_sedis   |
| OTU_1266 | 0.116330009 | 0.201470043  | 0.19     | Firmicutes Cluster 1  | 0.78            | 0.647731717    | 1.204716981 | unclassified.Lachnospiraceae     |

## b) mean of foldchange and Kendall's tau correlation of OTUs per bacterial cluster between paired biopsy and faecal samples

| CAG                   | Mean foldchange (biopsy/faecal) | Mean Kendall's tau |
|-----------------------|---------------------------------|--------------------|
| Bacteroides Cluster 1 | 2.56                            | 0.234              |
| Bacteroides Cluster 2 | 2.34                            | 0.165              |
| Firmicutes Cluster 1  | 0.71                            | 0.265              |
| Firmicutes Cluster 2  | 0.97                            | 0.220              |
| Pathogen Cluster      | 104.66                          | 0.166              |
| Prevotella Cluster    | 1.45                            | 0.156              |

|          |             |              |      |                       |      |             |             |                                    |
|----------|-------------|--------------|------|-----------------------|------|-------------|-------------|------------------------------------|
| OTU_1267 | 0.030183091 | 0.326839888  | 0.06 | Firmicutes Cluster 1  | 0.05 | 0.026886977 | 2           | unclassified.Lachnospiraceae       |
| OTU_1277 | 0.004234183 | 0.491909858  | 0.01 | Firmicutes Cluster 2  | 0.14 | 0.015276691 | 9.2         | unclassified.Lachnospiraceae       |
| OTU_1279 | 0.266636133 | 0.164291413  | 0.37 | Firmicutes Cluster 1  | 0.04 | 0.05988463  | 0.612244898 | Lachnospiraceae_incertae_sedis     |
| OTU_128  | 0.370665534 | 0.119622529  | 0.49 | Firmicutes Cluster 1  | 0.12 | 0.178431756 | 0.695205479 | Blautia                            |
| OTU_1283 | 0.020462955 | 0.339974155  | 0.05 | Firmicutes Cluster 1  | 0.03 | 0.051329683 | 0.666666667 | Anaerostipes                       |
| OTU_129  | 9.67E-05    | 0.658974261  | 0.00 | Prevotella Cluster    | 0.04 | 0.020165233 | 1.96969697  | Lachnospiraceae_incertae_sedis     |
| OTU_1295 | 0.209534358 | 0.208237222  | 0.30 | Firmicutes Cluster 1  | 0.01 | 0.022609503 | 0.405405405 | Lachnospiraceae_incertae_sedis     |
| OTU_1296 | 7.52E-05    | 0.513417148  | 0.00 | Firmicutes Cluster 1  | 0.35 | 0.408804263 | 0.855007474 | Faecalibacterium                   |
| OTU_13   | 0.002098787 | 0.38969155   | 0.01 | Firmicutes Cluster 1  | 0.60 | 0.707616347 | 0.848877375 | Gemmiger                           |
| OTU_1303 | 0.01465462  | 0.361284428  | 0.04 | Firmicutes Cluster 1  | 0.02 | 0.035441924 | 0.689655172 | Coprococcus                        |
| OTU_1306 | 0.810794722 | 0.038762602  | 0.85 | Prevotella Cluster    | 0.01 | 0.015276691 | 0.84        | unclassified.Lachnospiraceae       |
| OTU_1309 | 0.07163334  | 0.285267345  | 0.13 | Firmicutes Cluster 1  | 0.01 | 0.032997654 | 0.277777778 | Lachnospiraceae_incertae_sedis     |
| OTU_131  | 0.290112551 | 0.178599907  | 0.40 | Bacteroides Cluster 1 | 0.03 | 0.006110677 | 4.2         | Erysipelotrichaceae_incertae_sedis |
| OTU_1312 | 0.80016443  | -0.043908943 | 0.85 | Prevotella Cluster    | 0.00 | 0.006721744 | 0.545454545 | Lachnospiraceae_incertae_sedis     |
| OTU_1317 | 0.981005145 | 0.003829984  | 0.99 | Bacteroides Cluster 1 | 0.02 | 0.023831639 | 1.025641026 | Clostridium_XIVa                   |
| OTU_132  | 0.071308038 | 0.31154868   | 0.13 | Pathogen Cluster      | 0.98 | 0.001833203 | 533.6666667 | Pseudomonas                        |
| OTU_1320 | 0.159716686 | 0.187642084  | 0.25 | Firmicutes Cluster 1  | 0.13 | 0.12771314  | 1.033492823 | Clostridium_XIVa                   |
| OTU_1322 | 0.001876415 | 0.558415577  | 0.01 | Bacteroides Cluster 1 | 0.00 | 0.001833203 | 0.333333333 | Clostridium_XIVa                   |
| OTU_1324 | 1.25E-01    | 0.259029113  | 0.21 | Firmicutes Cluster 1  | 0.00 | 0.01833203  | 0.166666667 | unclassified.Lachnospiraceae       |
| OTU_1326 | NA          | NA           | NA   | Firmicutes Cluster 1  | 0.00 | 0.004888541 | 0           | unclassified.Lachnospiraceae       |
| OTU_133  | 9.10E-06    | 0.70661157   | 0.00 | Prevotella Cluster    | 0.03 | 0.111214314 | 0.252747253 | unclassified.Clostridiales         |
| OTU_1331 | 0.369078669 | 0.130625338  | 0.49 | Firmicutes Cluster 1  | 0.05 | 0.064162104 | 0.8         | Blautia                            |
| OTU_1337 | 0.042049261 | 0.340386694  | 0.08 | Firmicutes Cluster 1  | 0.01 | 0.01038815  | 0.647058824 | unclassified.Lachnospiraceae       |
| OTU_134  | 0.000636464 | 0.581016663  | 0.00 | Bacteroides Cluster 1 | 0.04 | 0.012832421 | 2.952380952 | unclassified.Ruminococcaceae       |
| OTU_1349 | 2.08E-01    | 0.217055181  | 0.30 | Firmicutes Cluster 1  | 0.00 | 0.006721744 | 0.454545455 | Lachnospiraceae_incertae_sedis     |
| OTU_135  | 1.43E-04    | 0.576042335  | 0.00 | Firmicutes Cluster 2  | 0.14 | 0.215706883 | 0.640226629 | Ruminococcus                       |
| OTU_1357 | 0.499575206 | -0.118940207 | 0.61 | Firmicutes Cluster 1  | 0.00 | 0.004277474 | 0.428571429 | unclassified.Lachnospiraceae       |
| OTU_1358 | 0.000369021 | 0.511695216  | 0.00 | Prevotella Cluster    | 0.39 | 0.205318733 | 1.87797619  | Clostridium_sensu_stricto          |
| OTU_136  | 0.065460554 | 0.284388146  | 0.12 | Prevotella Cluster    | 0.09 | 0.067217442 | 1.372727273 | Turicibacter                       |
| OTU_1366 | 0.002606656 | 0.503734921  | 0.01 | Prevotella Cluster    | 0.02 | 0.006721744 | 3           | Coprococcus                        |
| OTU_1370 | 0.423350286 | 0.128680644  | 0.54 | Firmicutes Cluster 1  | 0.01 | 0.026275909 | 0.488372093 | Blautia                            |
| OTU_1380 | 0.005024928 | 0.465945558  | 0.02 | Firmicutes Cluster 1  | 0.01 | 0.01833203  | 0.4         | unclassified.Lachnospiraceae       |
| OTU_1388 | 0.747992353 | -0.057114372 | 0.80 | Firmicutes Cluster 1  | 0.00 | 0.003055338 | 0.2         | Anaerostipes                       |
| OTU_139  | 0.000612191 | 0.538631095  | 0.00 | Prevotella Cluster    | 0.11 | 0.272536175 | 0.408071749 | unclassified.Bacteroidetes         |
| OTU_1395 | 0.793334385 | 0.038005611  | 0.85 | Firmicutes Cluster 1  | 0.04 | 0.134434885 | 0.272727273 | unclassified.Lachnospiraceae       |
| OTU_1396 | 0.000169763 | 0.599329127  | 0.00 | Firmicutes Cluster 1  | 0.06 | 0.085549472 | 0.692857143 | Blautia                            |
| OTU_14   | 3.48E-05    | 0.517766764  | 0.00 | Bacteroides Cluster 2 | 4.13 | 3.502028745 | 1.178851858 | Bacteroides                        |
| OTU_140  | 0.094681769 | 0.244142651  | 0.17 | Prevotella Cluster    | 0.07 | 0.032997654 | 2.092592593 | Howardella                         |
| OTU_141  | 0.166098594 | -0.229782621 | 0.26 | Pathogen Cluster      | 0.16 | 0.006721744 | 23.36363636 | Gemella                            |
| OTU_1415 | 0.40504979  | 0.107037561  | 0.52 | Firmicutes Cluster 1  | 0.24 | 0.326921197 | 0.745794393 | Clostridium_XIVa                   |
| OTU_142  | 0.014465471 | 0.310582971  | 0.04 | Firmicutes Cluster 2  | 1.25 | 1.3981228   | 0.892482517 | Gemmiger                           |
| OTU_1421 | 0.330117636 | 0.171304314  | 0.44 | Firmicutes Cluster 1  | 0.00 | 0.004888541 | 0.375       | Gemmiger                           |
| OTU_143  | 0.004112343 | 0.41906145   | 0.01 | Bacteroides Cluster 2 | 0.06 | 0.076994525 | 0.722222222 | Alistipes                          |
| OTU_1439 | NA          | NA           | NA   | Prevotella Cluster    | 0.00 | 0.004277474 | 0           | Clostridium_XI                     |
| OTU_144  | 0.08794441  | 0.29104275   | 0.16 | Pathogen Cluster      | 0.23 | 0.031775518 | 7.326923077 | Dialister                          |
| OTU_1446 | 0.157027055 | -0.235158541 | 0.25 | Firmicutes Cluster 1  | 0.01 | 0.011610285 | 0.578947368 | Lachnospiraceae_incertae_sedis     |
| OTU_145  | 0.23109117  | 0.171436256  | 0.33 | Firmicutes Cluster 2  | 0.10 | 0.048274345 | 2.037974684 | Lachnospiraceae_incertae_sedis     |
| OTU_1451 | NA          | NA           | NA   | Bacteroides Cluster 1 | 0.00 | 0.006721744 | 0           | Lachnospiraceae_incertae_sedis     |
| OTU_1454 | 0.42785406  | -0.128568013 | 0.54 | Firmicutes Cluster 1  | 0.01 | 0.034219789 | 0.267857143 | Lachnospiraceae_incertae_sedis     |
| OTU_1459 | 7.32E-01    | 0.057478147  | 0.79 | Bacteroides Cluster 2 | 0.01 | 0.009777083 | 0.75        | Clostridium_XIVa                   |
| OTU_1461 | 0.705925925 | -0.066993123 | 0.77 | Firmicutes Cluster 1  | 0.00 | 0.003055338 | 0.2         | Roseburia                          |
| OTU_1465 | 0.598070651 | -0.093449699 | 0.70 | Bacteroides Cluster 1 | 0.00 | 0.006110677 | 0.1         | Coprococcus                        |
| OTU_147  | 0.000207255 | 0.589332838  | 0.00 | Prevotella Cluster    | 0.04 | 0.07821666  | 0.5078125   | unclassified.Lachnospiraceae       |
| OTU_1475 | 0.566895426 | 0.074318187  | 0.68 | Firmicutes Cluster 1  | 0.13 | 0.194930583 | 0.670846395 | Blautia                            |
| OTU_1476 | 0.644546671 | 0.064645861  | 0.73 | Firmicutes Cluster 1  | 0.06 | 0.091660149 | 0.606666667 | Lachnospiraceae_incertae_sedis     |
| OTU_148  | 0.018725681 | 0.393740087  | 0.04 | Pathogen Cluster      | 0.39 | 0.260314822 | 1.509389671 | Porphyromonas                      |
| OTU_149  | 0.113795353 | 0.22448358   | 0.19 | Bacteroides Cluster 1 | 0.07 | 0.063551036 | 1.038461538 | Lachnospiraceae_incertae_sedis     |
| OTU_15   | 0.000408984 | 0.44789038   | 0.00 | Firmicutes Cluster 1  | 0.78 | 0.694172859 | 1.127640845 | Coprococcus                        |
| OTU_152  | 0.060403972 | 0.241346449  | 0.12 | Bacteroides Cluster 2 | 0.31 | 0.33119867  | 0.931734317 | Alistipes                          |
| OTU_1523 | 0.158034392 | 0.210719957  | 0.25 | Bacteroides Cluster 2 | 0.04 | 0.155211185 | 0.24015748  | Bacteroides                        |

|          |             |              |      |                       |      |             |             |                                  |
|----------|-------------|--------------|------|-----------------------|------|-------------|-------------|----------------------------------|
| OTU_1524 | 0.02575194  | 0.341518192  | 0.06 | Bacteroides Cluster 2 | 0.03 | 0.092882284 | 0.276315789 | Bacteroides                      |
| OTU_154  | 0.000813485 | 0.569064317  | 0.00 | Firmicutes Cluster 2  | 0.02 | 0.053162886 | 0.310344828 | Clostridium_IV                   |
| OTU_1548 | 0.082248184 | 0.28315857   | 0.15 | Firmicutes Cluster 2  | 0.01 | 0.017720962 | 0.75862069  | unclassified.Ruminococcaceae     |
| OTU_158  | 0.175397693 | 0.236682316  | 0.26 | Pathogen Cluster      | 0.04 | 0.001222135 | 31          | Solobacterium                    |
| OTU_16   | 6.64E-05    | 0.515411525  | 0.00 | Bacteroides Cluster 2 | 0.48 | 0.729614783 | 0.659966499 | Alistipes                        |
| OTU_161  | 0.00053368  | 0.498534859  | 0.00 | Firmicutes Cluster 2  | 0.06 | 0.120380329 | 0.502538071 | unclassified.Ruminococcaceae     |
| OTU_162  | 7.01E-06    | 0.770331073  | 0.00 | Bacteroides Cluster 2 | 0.06 | 0.014665624 | 4           | unclassified.Sutterellaceae      |
| OTU_163  | 0.026392203 | 0.316907182  | 0.06 | Bacteroides Cluster 2 | 0.08 | 0.084938404 | 0.899280576 | unclassified.Clostridiales       |
| OTU_165  | 0.001904922 | 0.549029773  | 0.01 | Bacteroides Cluster 2 | 0.04 | 0.003055338 | 14.2        | unclassified.Alphaproteobacteria |
| OTU_166  | 0.710790202 | -0.06557377  | 0.77 | Prevotella Cluster    | 0.02 | 0.005499609 | 3.222222222 | unclassified.Clostridiales       |
| OTU_1663 | 0.707122686 | 0.064569904  | 0.77 | Bacteroides Cluster 2 | 0.01 | 0.008554947 | 0.857142857 | Barnesiella                      |
| OTU_167  | 1.09E-03    | 0.479372485  | 0.01 | Bacteroides Cluster 1 | 0.04 | 0.052551819 | 0.709302326 | Flavonifractor                   |
| OTU_17   | 0.01059235  | 0.324717178  | 0.03 | Bacteroides Cluster 1 | 1.07 | 1.740931756 | 0.614601615 | Bacteroides                      |
| OTU_1705 | 0.469103119 | 0.124559831  | 0.58 | Firmicutes Cluster 1  | 0.00 | 0.013443488 | 0.227272727 | Coprococcus                      |
| OTU_1707 | 6.39E-02    | 0.238473058  | 0.12 | Firmicutes Cluster 1  | 0.26 | 0.461356081 | 0.569536424 | Blautia                          |
| OTU_171  | 0.000281817 | 0.528396982  | 0.00 | Prevotella Cluster    | 0.29 | 0.23220571  | 1.257894737 | Phascolarctobacterium            |
| OTU_1712 | 0.641428209 | 0.069465083  | 0.73 | Firmicutes Cluster 1  | 0.02 | 0.051940751 | 0.376470588 | Lachnospiracea_incertae_sedis    |
| OTU_1718 | 0.040514881 | 0.272543929  | 0.08 | Firmicutes Cluster 1  | 0.09 | 0.146656238 | 0.629166667 | Dorea                            |
| OTU_1719 | 1           | 0            | 1.00 | Firmicutes Cluster 1  | 0.01 | 0.004277474 | 1.428571429 | unclassified.Lachnospiraceae     |
| OTU_1725 | 0.119846362 | 0.230741548  | 0.20 | Bacteroides Cluster 1 | 0.14 | 0.045830074 | 3.053333333 | Clostridium_XIVa                 |
| OTU_1726 | 0.065930539 | 0.315333202  | 0.12 | Firmicutes Cluster 2  | 0.01 | 0.014054556 | 0.391304348 | Lachnospiracea_incertae_sedis    |
| OTU_173  | 5.69E-06    | 0.796280058  | 0.00 | Bacteroides Cluster 2 | 0.03 | 0.00794388  | 4           | unclassified.Clostridiales       |
| OTU_1732 | 8.19E-01    | -3.66E-02    | 0.86 | Firmicutes Cluster 1  | 0.01 | 0.032386586 | 0.245283019 | Lachnospiracea_incertae_sedis    |
| OTU_1738 | 0.651996164 | 0.079094026  | 0.73 | Bacteroides Cluster 1 | 0.00 | 0.004888541 | 0.75        | Lachnospiracea_incertae_sedis    |
| OTU_1749 | 0.01261546  | 0.399900116  | 0.03 | Bacteroides Cluster 1 | 0.04 | 0.012221353 | 3.55        | Clostridium_XIVa                 |
| OTU_1756 | 9.86E-01    | -0.002541397 | 0.99 | Firmicutes Cluster 1  | 0.03 | 0.044607939 | 0.767123288 | Blautia                          |
| OTU_1759 | 0.04139571  | 0.347019503  | 0.08 | Prevotella Cluster    | 0.01 | 0.005499609 | 1.444444444 | unclassified.Lachnospiraceae     |
| OTU_1760 | 0.448405324 | -0.125418965 | 0.56 | Firmicutes Cluster 1  | 0.01 | 0.015276691 | 0.36        | Lachnospiracea_incertae_sedis    |
| OTU_1762 | 0.134333988 | 0.234366826  | 0.22 | Firmicutes Cluster 1  | 0.01 | 0.035441924 | 0.310344828 | Lachnospiracea_incertae_sedis    |
| OTU_177  | 0.424489232 | 0.128451703  | 0.54 | Bacteroides Cluster 2 | 0.02 | 0.010999218 | 1.611111111 | Clostridium_XIVb                 |
| OTU_1772 | 0.381995703 | 0.121852407  | 0.49 | Firmicutes Cluster 1  | 0.05 | 0.141767697 | 0.323275862 | unclassified.Lachnospiraceae     |
| OTU_1774 | 0.80990218  | -0.038806942 | 0.85 | Firmicutes Cluster 2  | 0.02 | 0.031164451 | 0.490196078 | unclassified.Lachnospiraceae     |
| OTU_1776 | 0.049649166 | 0.266994924  | 0.10 | Firmicutes Cluster 1  | 0.12 | 0.113658584 | 1.02688172  | unclassified.Lachnospiraceae     |
| OTU_178  | 2.23E-04    | 0.601521236  | 0.00 | Prevotella Cluster    | 0.03 | 0.031775518 | 1.076923077 | Paraprevotella                   |
| OTU_1781 | 0.03450698  | 0.328070526  | 0.07 | Bacteroides Cluster 1 | 0.02 | 0.026275909 | 0.88372093  | Clostridium_XIVa                 |
| OTU_179  | 0.201209289 | 0.190758536  | 0.29 | Bacteroides Cluster 2 | 0.05 | 0.058662495 | 0.895833333 | unclassified.Ruminococcaceae     |
| OTU_18   | 4.07E-05    | 0.534334764  | 0.00 | Bacteroides Cluster 2 | 0.75 | 0.463800352 | 1.621870883 | Parabacteroides                  |
| OTU_181  | 0.296605646 | 0.164441462  | 0.41 | Firmicutes Cluster 2  | 0.02 | 0.117936058 | 0.165803109 | unclassified.Lachnospiraceae     |
| OTU_182  | 0.003978954 | 0.483074429  | 0.01 | Bacteroides Cluster 2 | 0.02 | 0.008554947 | 2.571428571 | unclassified.Ruminococcaceae     |
| OTU_183  | 0.236780693 | -0.168950487 | 0.34 | Prevotella Cluster    | 0.04 | 0.044607939 | 0.97260274  | Eubacterium                      |
| OTU_186  | 0.002878335 | 0.483125754  | 0.01 | Firmicutes Cluster 2  | 0.03 | 0.063551036 | 0.548076923 | unclassified.Ruminococcaceae     |
| OTU_187  | 0.016384098 | 0.382500916  | 0.04 | Prevotella Cluster    | 0.03 | 0.036052992 | 0.86440678  | unclassified.Ruminococcaceae     |
| OTU_1877 | 0.23421761  | 0.165343586  | 0.34 | Firmicutes Cluster 1  | 0.06 | 0.155211185 | 0.38976378  | Blautia                          |
| OTU_189  | 0.003051436 | 0.502775368  | 0.01 | Firmicutes Cluster 1  | 0.02 | 0.061106766 | 0.3         | Clostridium_XIVb                 |
| OTU_19   | 0.000364753 | 0.460413845  | 0.00 | Firmicutes Cluster 1  | 0.28 | 0.166210403 | 1.658088235 | Coprococcus                      |
| OTU_1925 | 0.710986976 | 0.060784175  | 0.77 | Prevotella Cluster    | 0.02 | 0.015887759 | 1.346153846 | Clostridium_XIVb                 |
| OTU_1936 | 0.588126494 | -0.094294001 | 0.69 | Prevotella Cluster    | 0.00 | 0.011610285 | 0.263157895 | unclassified.Ruminococcaceae     |
| OTU_196  | 0.480120628 | 0.108439298  | 0.59 | Bacteroides Cluster 2 | 0.03 | 0.040330465 | 0.803030303 | Alistipes                        |
| OTU_197  | 0.086492613 | 0.290034777  | 0.15 | Pathogen Cluster      | 0.03 | 0.136268088 | 0.201793722 | Bacteroides                      |
| OTU_1977 | 0.002047091 | 0.456937747  | 0.01 | Firmicutes Cluster 2  | 0.10 | 0.112436449 | 0.907608696 | Ruminococcus                     |
| OTU_199  | 0.096411876 | 0.289088508  | 0.17 | Firmicutes Cluster 2  | 0.01 | 0.006721744 | 1           | unclassified.Clostridiales       |
| OTU_2    | 0.000337974 | 0.446014354  | 0.00 | Firmicutes Cluster 1  | 3.82 | 4.171758897 | 0.915043211 | Faecalibacterium                 |
| OTU_20   | 0.001978911 | 0.42204247   | 0.01 | Prevotella Cluster    | 0.36 | 0.483965585 | 0.742424242 | Clostridium_XI                   |
| OTU_200  | 0.155731251 | 0.22370079   | 0.25 | Firmicutes Cluster 1  | 0.01 | 0.021998436 | 0.555555556 | unclassified.Lachnospiraceae     |
| OTU_201  | 0.018539952 | 0.393130141  | 0.04 | Prevotella Cluster    | 0.02 | 0.019554165 | 0.875       | Bacteroides                      |
| OTU_2018 | 0.949056346 | -0.009813358 | 0.96 | Firmicutes Cluster 2  | 0.01 | 0.034830856 | 0.385964912 | unclassified.Clostridiales       |
| OTU_203  | 0.003292685 | 0.488285579  | 0.01 | Bacteroides Cluster 2 | 0.04 | 0.040941533 | 1.044776119 | Clostridium_IV                   |
| OTU_205  | 0.004198561 | 0.450491309  | 0.01 | Prevotella Cluster    | 0.02 | 0.053773954 | 0.420454545 | Mogibacterium                    |
| OTU_206  | 0.000917639 | 0.574960257  | 0.00 | Bacteroides Cluster 2 | 0.08 | 0.021998436 | 3.472222222 | unclassified.Ruminococcaceae     |
| OTU_2064 | 0.796357116 | -0.045992205 | 0.85 | Firmicutes Cluster 2  | 0.00 | 0.007332812 | 0.166666667 | Coprococcus                      |

|         |             |              |      |                       |      |             |             |                                |
|---------|-------------|--------------|------|-----------------------|------|-------------|-------------|--------------------------------|
| OTU_207 | 0.622758813 | 0.084242082  | 0.72 | Prevotella Cluster    | 0.01 | 0.001833203 | 5           | Flavonifractor                 |
| OTU_208 | 0.059439952 | 0.288421542  | 0.11 | Firmicutes Cluster 2  | 0.02 | 0.04949648  | 0.419753086 | unclassified.Clostridiales     |
| OTU_21  | 0.018224227 | 0.306710831  | 0.04 | Firmicutes Cluster 1  | 0.23 | 0.232816777 | 0.989501312 | Clostridium_XIVa               |
| OTU_212 | 0.004621576 | 0.451494609  | 0.02 | Bacteroides Cluster 2 | 0.04 | 0.035441924 | 1.24137931  | Butyricimonas                  |
| OTU_213 | 0.108054067 | 0.246836525  | 0.19 | Prevotella Cluster    | 0.06 | 0.060495698 | 1           | Veillonella                    |
| OTU_214 | 0.026073726 | 0.382982191  | 0.06 | Bacteroides Cluster 1 | 0.01 | 0.009777083 | 0.8125      | Lachnospiracea_incertae_sedis  |
| OTU_216 | 0.014103693 | 0.403274488  | 0.04 | Prevotella Cluster    | 0.02 | 0.025053774 | 0.609756098 | unclassified.Clostridiales     |
| OTU_217 | 4.80E-05    | 0.659040627  | 0.00 | Prevotella Cluster    | 0.04 | 0.022609503 | 1.918918919 | unclassified.Clostridiales     |
| OTU_218 | 0.236817539 | 0.192699216  | 0.34 | Bacteroides Cluster 2 | 0.02 | 0.012832421 | 1.238095238 | Alistipes                      |
| OTU_22  | 0.002343765 | 0.384773663  | 0.01 | Firmicutes Cluster 1  | 0.60 | 0.738780798 | 0.811414392 | Dorea                          |
| OTU_222 | 0.748079567 | -0.056796183 | 0.80 | Prevotella Cluster    | 0.01 | 0.005499609 | 1.111111111 | Peptococcus                    |
| OTU_223 | 7.06E-01    | -0.066993123 | 0.77 | Bacteroides Cluster 1 | 0.01 | 0.000611068 | 10          | Anaerorhabdus                  |
| OTU_226 | 1           | 0            | 1.00 | Bacteroides Cluster 2 | 0.02 | 0.013443488 | 1.727272727 | Clostridium_IV                 |
| OTU_228 | 0.000109663 | 0.629222482  | 0.00 | Prevotella Cluster    | 0.04 | 0.042163668 | 0.855072464 | Faecalibacterium               |
| OTU_229 | 8.38E-05    | 0.667855022  | 0.00 | Bacteroides Cluster 2 | 0.06 | 0.020165233 | 3.212121212 | unclassified.Clostridiales     |
| OTU_23  | 0.000355839 | 0.453886254  | 0.00 | Firmicutes Cluster 2  | 0.68 | 1.24168948  | 0.543799213 | unclassified.Ruminococcaceae   |
| OTU_230 | 0.003699418 | 0.458891852  | 0.01 | Firmicutes Cluster 2  | 0.07 | 0.07577239  | 0.975806452 | unclassified.Ruminococcaceae   |
| OTU_231 | 0.025719351 | 0.391391893  | 0.06 | Bacteroides Cluster 1 | 0.00 | 0.004277474 | 1           | unclassified.Lachnospiraceae   |
| OTU_234 | 2.07E-05    | 0.581640344  | 0.00 | Bacteroides Cluster 2 | 0.49 | 0.561577177 | 0.87921654  | Bacteroides                    |
| OTU_235 | 0.165554867 | 0.235606668  | 0.26 | Bacteroides Cluster 1 | 0.01 | 0.009166015 | 0.733333333 | Barnesiella                    |
| OTU_237 | 0.001904922 | 0.549029773  | 0.01 | Bacteroides Cluster 1 | 0.03 | 0.000611068 | 44          | Clostridium_XIVb               |
| OTU_239 | 0.01447871  | 0.317784646  | 0.04 | Prevotella Cluster    | 0.79 | 0.39658291  | 1.993836672 | Streptococcus                  |
| OTU_24  | 0.126178953 | 0.193216957  | 0.21 | Firmicutes Cluster 1  | 0.69 | 1.388345718 | 0.500440141 | Lachnospiracea_incertae_sedis  |
| OTU_240 | 0.157018688 | 0.230390858  | 0.25 | Prevotella Cluster    | 0.02 | 0.017109894 | 0.892857143 | unclassified.Coriobacteriaceae |
| OTU_241 | 0.909251484 | 0.019481341  | 0.93 | Bacteroides Cluster 1 | 0.01 | 0.022609503 | 0.351351351 | Clostridium_XIVa               |
| OTU_242 | 0.510846609 | 0.089770053  | 0.62 | Firmicutes Cluster 1  | 0.08 | 0.166210403 | 0.477941176 | Lachnospiracea_incertae_sedis  |
| OTU_246 | 0.785447361 | 0.043391227  | 0.84 | Bacteroides Cluster 2 | 0.02 | 0.013443488 | 1.409090909 | Pseudoflavonifractor           |
| OTU_247 | 0.110704064 | 0.272727273  | 0.19 | Bacteroides Cluster 2 | 0.01 | 0.022609503 | 0.432432432 | Alistipes                      |
| OTU_249 | 0.70623731  | -0.066136033 | 0.77 | Pathogen Cluster      | 0.03 | 0.046441142 | 0.605263158 | Peptoniphilus                  |
| OTU_25  | 5.11E-03    | 0.380248938  | 0.02 | Bacteroides Cluster 2 | 1.11 | 0.827385608 | 1.345642541 | Bifidobacterium                |
| OTU_251 | 0.019154487 | 0.296296296  | 0.04 | Bacteroides Cluster 1 | 1.03 | 1.536835158 | 0.671172962 | Bacteroides                    |
| OTU_259 | 0.003357042 | 0.495742104  | 0.01 | Bacteroides Cluster 2 | 0.02 | 0.012832421 | 1.904761905 | Clostridium_IV                 |
| OTU_26  | 8.88E-06    | 0.658349745  | 0.00 | Prevotella Cluster    | 3.50 | 4.686888932 | 0.746675359 | Prevotella                     |
| OTU_261 | 0.150383639 | 0.252788311  | 0.24 | Prevotella Cluster    | 0.00 | 0.006110677 | 0.5         | unclassified.Clostridiales     |
| OTU_262 | 0.612780034 | -0.084224494 | 0.71 | Pathogen Cluster      | 0.01 | 0.015276691 | 0.96        | Eggerthella                    |
| OTU_263 | 0.915801431 | -0.017857459 | 0.94 | Bacteroides Cluster 2 | 0.01 | 0.008554947 | 1.071428571 | unclassified.Ruminococcaceae   |
| OTU_269 | 0.001056833 | 0.563380282  | 0.01 | Bacteroides Cluster 2 | 0.01 | 0.021387368 | 0.685714286 | unclassified.Clostridiales     |
| OTU_27  | 0.001291531 | 0.459153624  | 0.01 | Prevotella Cluster    | 0.40 | 0.27131404  | 1.486486486 | Clostridium_sensu_stricto      |
| OTU_274 | 0.387677388 | 0.144106177  | 0.50 | Firmicutes Cluster 1  | 0.01 | 0.01038815  | 0.941176471 | Butyricoccus                   |
| OTU_275 | 0.020649191 | 0.389473684  | 0.05 | Bacteroides Cluster 2 | 0.01 | 0.012221353 | 1.05        | Methanobrevibacter             |
| OTU_277 | 1.29E-04    | 0.666666667  | 0.00 | Bacteroides Cluster 2 | 0.01 | 0.046441142 | 0.263157895 | Gemmiger                       |
| OTU_278 | 0.004929019 | 0.46875      | 0.02 | Firmicutes Cluster 1  | 0.02 | 0.012832421 | 1.476190476 | Coprococcus                    |
| OTU_279 | 0.003194059 | 0.480903312  | 0.01 | Prevotella Cluster    | 0.01 | 0.026886977 | 0.363636364 | unclassified.Ruminococcaceae   |
| OTU_28  | 0.017167932 | 0.356813464  | 0.04 | Prevotella Cluster    | 0.42 | 0.205318733 | 2.032738095 | Haemophilus                    |
| OTU_283 | 0.979387324 | 0.004404688  | 0.99 | Bacteroides Cluster 1 | 0.01 | 0.00794388  | 0.846153846 | Holdemania                     |
| OTU_288 | 0.277906948 | 0.175406503  | 0.38 | Prevotella Cluster    | 0.01 | 0.014665624 | 0.791666667 | Clostridium_XIVa               |
| OTU_29  | 0.007443213 | 0.423692469  | 0.02 | Bacteroides Cluster 2 | 0.22 | 0.516963238 | 0.429078014 | Bacteroides                    |
| OTU_290 | 0.003723575 | 0.471159953  | 0.01 | Prevotella Cluster    | 0.03 | 0.080049863 | 0.381679389 | Paraprevotella                 |
| OTU_291 | 0.356611646 | 0.153259496  | 0.48 | Bacteroides Cluster 2 | 0.01 | 0.010999218 | 0.833333333 | Oscillibacter                  |
| OTU_293 | 0.123892754 | 0.265822103  | 0.21 | Prevotella Cluster    | 0.01 | 0.003055338 | 4.4         | unclassified.Ruminococcaceae   |
| OTU_297 | 8.76E-03    | 0.452991453  | 0.03 | Bacteroides Cluster 2 | 0.01 | 0.014665624 | 0.708333333 | unclassified.Coriobacteriaceae |
| OTU_3   | 0.000743966 | 0.411290323  | 0.00 | Bacteroides Cluster 1 | 5.86 | 7.012001369 | 0.83546841  | Bacteroides                    |
| OTU_30  | 0.039129321 | 0.258922833  | 0.08 | Bacteroides Cluster 2 | 0.85 | 1.118253813 | 0.759562842 | Oscillibacter                  |
| OTU_300 | 0.712907301 | 0.060099858  | 0.77 | Firmicutes Cluster 2  | 0.02 | 0.007332812 | 2.916666667 | Sporobacter                    |
| OTU_305 | 0.450505507 | -0.121043267 | 0.56 | Bacteroides Cluster 2 | 0.01 | 0.017720962 | 0.551724138 | unclassified.Ruminococcaceae   |
| OTU_306 | 0.194656862 | 0.220265173  | 0.29 | Bacteroides Cluster 2 | 0.03 | 0.010999218 | 2.444444444 | Clostridium_IV                 |
| OTU_31  | 0.004835056 | 0.364410051  | 0.02 | Bacteroides Cluster 2 | 0.63 | 0.593346695 | 1.056642636 | Bacteroides                    |
| OTU_314 | 0.078201797 | 0.286530348  | 0.14 | Bacteroides Cluster 2 | 0.02 | 0.009166015 | 2.533333333 | unclassified.Clostridiales     |
| OTU_32  | 2.33E-06    | 0.750517059  | 0.00 | Prevotella Cluster    | 0.90 | 1.502004302 | 0.601708706 | Bacteroides                    |
| OTU_321 | 2.35E-01    | 0.175798057  | 0.34 | Firmicutes Cluster 1  | 0.03 | 0.051940751 | 0.635294118 | Lachnospiracea_incertae_sedis  |

|         |             |              |      |                       |      |             |             |                                  |
|---------|-------------|--------------|------|-----------------------|------|-------------|-------------|----------------------------------|
| OTU_322 | NA          | NA           | NA   | Pathogen Cluster      | 0.06 | 0           | Inf         | Staphylococcus                   |
| OTU_324 | 0.050519694 | 0.305648663  | 0.10 | Firmicutes Cluster 2  | 0.02 | 0.017109894 | 1.035714286 | Anaerotruncus                    |
| OTU_325 | 0.506496376 | 0.112017924  | 0.61 | Prevotella Cluster    | 0.01 | 0.012832421 | 0.904761905 | Clostridium_XIVa                 |
| OTU_327 | 0.00044304  | 0.593464102  | 0.00 | Prevotella Cluster    | 0.01 | 0.023831639 | 0.282051282 | Slackia                          |
| OTU_33  | 8.75E-05    | 0.580388791  | 0.00 | Prevotella Cluster    | 1.18 | 0.102048299 | 11.58083832 | Sutterella                       |
| OTU_330 | 0.007757656 | 0.467520803  | 0.02 | Prevotella Cluster    | 0.00 | 0.005499609 | 0.444444444 | unclassified.Clostridiales       |
| OTU_331 | 0.18022977  | 0.233333333  | 0.27 | Firmicutes Cluster 2  | 0.04 | 0.022609503 | 1.837837838 | unclassified.Clostridiales       |
| OTU_34  | 0.1613195   | -0.212748795 | 0.25 | Pathogen Cluster      | 2.81 | 0.004277474 | 657.5714286 | Halomonas                        |
| OTU_342 | 0.167299188 | 0.226495726  | 0.26 | Firmicutes Cluster 2  | 0.01 | 0.011610285 | 1           | unclassified.Clostridiales       |
| OTU_347 | 0.225207251 | 0.203104276  | 0.33 | Bacteroides Cluster 2 | 0.02 | 0.004888541 | 3.5         | Victivallis                      |
| OTU_35  | 0.000727464 | 0.569873934  | 0.00 | Prevotella Cluster    | 0.95 | 0.681951506 | 1.393369176 | Bacteroides                      |
| OTU_351 | 0.381163589 | 0.14101019   | 0.49 | Bacteroides Cluster 2 | 0.04 | 0.009166015 | 3.866666667 | unclassified.Clostridiales       |
| OTU_354 | 0.834254474 | 0.036408196  | 0.87 | Bacteroides Cluster 2 | 0.00 | 0.003055338 | 1.6         | Lachnospiraceae_incertae_sedis   |
| OTU_355 | 0.013327658 | 0.417465789  | 0.04 | Prevotella Cluster    | 0.01 | 0.015887759 | 0.615384615 | unclassified.Coriobacteriaceae   |
| OTU_357 | 0.005623634 | 0.4382699    | 0.02 | Firmicutes Cluster 1  | 0.02 | 0.02872018  | 0.617021277 | Lachnospiraceae_incertae_sedis   |
| OTU_36  | 0.022441114 | 0.364994138  | 0.05 | Prevotella Cluster    | 0.91 | 1.948083692 | 0.467691343 | Streptococcus                    |
| OTU_360 | 0.305993394 | -0.176679548 | 0.42 | Firmicutes Cluster 2  | 0.00 | 0.004888541 | 0.875       | Lachnospiraceae_incertae_sedis   |
| OTU_361 | 0.063643399 | 0.307362187  | 0.12 | Bacteroides Cluster 2 | 0.01 | 0.012832421 | 0.857142857 | unclassified.Ruminococcaceae     |
| OTU_366 | 0.680293245 | 0.073044083  | 0.76 | Bacteroides Cluster 2 | 0.00 | 0.004888541 | 0.875       | unclassified.Ruminococcaceae     |
| OTU_368 | 0.657341717 | -0.075389857 | 0.74 | Bacteroides Cluster 2 | 0.01 | 0.005499609 | 1.444444444 | Anaerotruncus                    |
| OTU_37  | 0.001065726 | 0.446465239  | 0.01 | Firmicutes Cluster 1  | 0.12 | 0.163766132 | 0.720149254 | Lachnospiraceae_incertae_sedis   |
| OTU_370 | 0.017454896 | 0.386474896  | 0.04 | Bacteroides Cluster 2 | 0.01 | 0.026275909 | 0.372093023 | Alistipes                        |
| OTU_371 | 0.000372701 | 0.620395465  | 0.00 | Bacteroides Cluster 2 | 0.00 | 0.003666406 | 1.333333333 | unclassified.Desulfovibrionaceae |
| OTU_373 | 0.002666552 | 0.532903504  | 0.01 | Bacteroides Cluster 2 | 0.00 | 0.003666406 | 0.833333333 | Clostridium_IV                   |
| OTU_375 | 7.67E-07    | 0.84094517   | 0.00 | Prevotella Cluster    | 0.06 | 0.142989832 | 0.388888889 | unclassified.Porphyromonadaceae  |
| OTU_378 | 0.675902782 | 0.071362403  | 0.76 | Firmicutes Cluster 2  | 0.01 | 0.00794388  | 0.846153846 | Oscillibacter                    |
| OTU_38  | 0.000656752 | 0.462735825  | 0.00 | Bacteroides Cluster 2 | 0.30 | 0.315310911 | 0.945736434 | Alistipes                        |
| OTU_380 | 0.015242238 | 0.423678068  | 0.04 | Bacteroides Cluster 2 | 0.00 | 0.003666406 | 1.166666667 | Clostridium_IV                   |
| OTU_382 | NA          | NA           | NA   | Prevotella Cluster    | 0.00 | 0.004888541 | 0           | unclassified.Ruminococcaceae     |
| OTU_385 | 0.684866655 | 0.071115698  | 0.76 | Prevotella Cluster    | 0.01 | 0.002444271 | 2.75        | Rothia                           |
| OTU_387 | 0.397190191 | 0.143722882  | 0.51 | Bacteroides Cluster 2 | 0.01 | 0.011610285 | 0.473684211 | unclassified.Clostridiales       |
| OTU_39  | 8.31E-05    | 0.562225543  | 0.00 | Firmicutes Cluster 1  | 0.23 | 0.296978882 | 0.790123457 | Lachnospiraceae_incertae_sedis   |
| OTU_397 | 0.146555786 | 0.236354399  | 0.23 | Bacteroides Cluster 2 | 0.03 | 0.014665624 | 1.833333333 | Butyricimonas                    |
| OTU_4   | 0.002057154 | 0.39215754   | 0.01 | Firmicutes Cluster 1  | 0.67 | 1.132919437 | 0.588996764 | Anaerostipes                     |
| OTU_40  | 1.94E-02    | 0.322367866  | 0.04 | Bacteroides Cluster 1 | 0.27 | 0.053162886 | 4.988505747 | Clostridium_XIVa                 |
| OTU_41  | 0.006805529 | 0.429954839  | 0.02 | Prevotella Cluster    | 0.13 | 0.554238365 | 0.234840132 | Clostridium_sensu_stricto        |
| OTU_412 | 0.00277816  | 0.450326605  | 0.01 | Bacteroides Cluster 2 | 0.05 | 0.035441924 | 1.344827586 | Butyricimonas                    |
| OTU_415 | 2.45E-06    | 0.749724292  | 0.00 | Prevotella Cluster    | 0.66 | 0.915990418 | 0.715143429 | Prevotella                       |
| OTU_42  | 0.017633931 | 0.31327575   | 0.04 | Prevotella Cluster    | 0.62 | 0.590902425 | 1.045501551 | Clostridium_XI                   |
| OTU_43  | 0.903806627 | -0.018878008 | 0.93 | Pathogen Cluster      | 1.63 | 0.001833203 | 888.3333333 | Shewanella                       |
| OTU_430 | 0.009185544 | 0.379486496  | 0.03 | Bacteroides Cluster 2 | 0.06 | 0.053773954 | 1.147727273 | Acetanaerobacterium              |
| OTU_436 | 0.115739112 | 0.271493723  | 0.19 | Pathogen Cluster      | 0.02 | 0.000611068 | 34          | Actinomyces                      |
| OTU_438 | 0.125344922 | 0.259976892  | 0.21 | Firmicutes Cluster 2  | 0.00 | 0.010999218 | 0.333333333 | Enterorhabdus                    |
| OTU_44  | 0.011971269 | 0.32936252   | 0.03 | Firmicutes Cluster 1  | 0.29 | 0.281091122 | 1.02173913  | Lachnospiraceae_incertae_sedis   |
| OTU_444 | 0.367040608 | 0.151720252  | 0.49 | Bacteroides Cluster 2 | 0.00 | 0.012832421 | 0.333333333 | Pseudoflavonifractor             |
| OTU_45  | 2.62E-06    | 0.606124942  | 0.00 | Firmicutes Cluster 1  | 0.55 | 0.31042237  | 1.779527559 | unclassified.Lachnospiraceae     |
| OTU_456 | 0.006903185 | 0.442268981  | 0.02 | Prevotella Cluster    | 0.04 | 0.0207763   | 1.705882353 | Allisonella                      |
| OTU_457 | 0.033762768 | 0.31935106   | 0.07 | Firmicutes Cluster 1  | 0.12 | 0.06782851  | 1.756756757 | Lachnospiraceae_incertae_sedis   |
| OTU_458 | 0.568231383 | 0.100156617  | 0.68 | Bacteroides Cluster 2 | 0.01 | 0.001833203 | 3.666666667 | unclassified.Clostridiales       |
| OTU_46  | 0.072548996 | 0.288503959  | 0.13 | Pathogen Cluster      | 0.80 | 3.070614978 | 0.260895522 | Klebsiella                       |
| OTU_468 | 0.53778182  | -0.107826504 | 0.65 | Bacteroides Cluster 2 | 0.00 | 0.002444271 | 2           | unclassified.Ruminococcaceae     |
| OTU_47  | 1.40E-05    | 0.586639852  | 0.00 | Firmicutes Cluster 1  | 0.14 | 0.180876027 | 0.766891892 | Clostridium_XVIII                |
| OTU_470 | 0.010410241 | 0.436398893  | 0.03 | Bacteroides Cluster 2 | 0.01 | 0.001833203 | 7.333333333 | unclassified.Oxalobacteraceae    |
| OTU_48  | 0.024076813 | 0.307775935  | 0.05 | Prevotella Cluster    | 0.20 | 0.157044388 | 1.295719844 | Clostridium_XIVb                 |
| OTU_49  | 0.049480965 | 0.329064156  | 0.10 | Pathogen Cluster      | 0.29 | 0.012221353 | 23.7        | Fusobacterium                    |
| OTU_5   | 0.084806349 | 0.217214939  | 0.15 | Firmicutes Cluster 1  | 1.21 | 1.541112632 | 0.787073751 | Lachnospiraceae_incertae_sedis   |
| OTU_502 | 0.003433994 | 0.50511572   | 0.01 | Firmicutes Cluster 2  | 0.01 | 0.003055338 | 2.2         | unclassified.Clostridiales       |
| OTU_507 | 0.001150239 | 0.53843376   | 0.01 | Bacteroides Cluster 2 | 0.09 | 0.062328901 | 1.421568627 | Bacteroides                      |
| OTU_51  | 4.44E-05    | 0.555964316  | 0.00 | Firmicutes Cluster 2  | 0.27 | 0.414914939 | 0.659793814 | Sporobacter                      |
| OTU_52  | NA          | NA           | NA   | Prevotella Cluster    | 0.00 | 0.001222135 | 0           | Fusobacterium                    |

|         |             |              |      |                       |      |             |             |                                    |
|---------|-------------|--------------|------|-----------------------|------|-------------|-------------|------------------------------------|
| OTU_53  | 1.72E-06    | 0.77333545   | 0.00 | Bacteroides Cluster 2 | 0.14 | 0.1643772   | 0.821561338 | Phascolarctobacterium              |
| OTU_534 | 0.022846058 | 0.390231006  | 0.05 | Prevotella Cluster    | 0.02 | 0.005499609 | 4.222222222 | Desulfovibrio                      |
| OTU_535 | 0.37879454  | -0.147117164 | 0.49 | Bacteroides Cluster 1 | 0.01 | 0.006721744 | 2           | Clostridium_XIVa                   |
| OTU_536 | 0.029460556 | 0.296053068  | 0.06 | Bacteroides Cluster 1 | 0.12 | 0.342197888 | 0.358928571 | Bacteroides                        |
| OTU_54  | 0.628402917 | -0.070160407 | 0.72 | Firmicutes Cluster 1  | 0.05 | 0.032997654 | 1.481481481 | Clostridium_XIVa                   |
| OTU_545 | 0.005111574 | 0.482600547  | 0.02 | Bacteroides Cluster 2 | 0.01 | 0.001833203 | 5.333333333 | Erysipelotrichaceae_incertae_sedis |
| OTU_55  | 0.051672971 | 0.261356734  | 0.10 | Bacteroides Cluster 2 | 0.19 | 0.313477708 | 0.598440546 | Bifidobacterium                    |
| OTU_555 | 0.169281506 | 0.223935339  | 0.26 | Bacteroides Cluster 2 | 0.05 | 0.137490223 | 0.342222222 | Alistipes                          |
| OTU_56  | 1.65E-07    | 0.815602837  | 0.00 | Bacteroides Cluster 2 | 0.24 | 0.055607157 | 4.351648352 | Sutterella                         |
| OTU_57  | 7.87E-06    | 0.664878943  | 0.00 | Firmicutes Cluster 2  | 0.37 | 0.348308565 | 1.073684211 | unclassified.Clostridiales         |
| OTU_58  | 2.11E-05    | 0.666671449  | 0.00 | Prevotella Cluster    | 0.27 | 0.22426183  | 1.185286104 | Desulfovibrio                      |
| OTU_580 | 0.391509791 | 0.150278648  | 0.50 | Firmicutes Cluster 2  | 0.00 | 0.004277474 | 0.714285714 | Oscillibacter                      |
| OTU_586 | 0.00340692  | 0.468965066  | 0.01 | Prevotella Cluster    | 0.03 | 0.018943097 | 1.35483871  | Clostridium_XIVa                   |
| OTU_59  | 0.006071315 | 0.355319149  | 0.02 | Bacteroides Cluster 2 | 1.03 | 0.596402034 | 1.719262295 | Ruminococcus                       |
| OTU_593 | 0.107151911 | 0.272842658  | 0.19 | Pathogen Cluster      | 0.01 | 0.007332812 | 1.75        | Clostridium_XVIII                  |
| OTU_6   | 0.040340642 | 0.259264199  | 0.08 | Pathogen Cluster      | 2.96 | 3.740345131 | 0.792517562 | Escherichia_Shigella               |
| OTU_60  | 0.013667274 | 0.322256651  | 0.04 | Firmicutes Cluster 2  | 0.15 | 0.384361557 | 0.383147854 | Oscillibacter                      |
| OTU_603 | 0.116317273 | 0.22304299   | 0.19 | Firmicutes Cluster 2  | 0.08 | 0.08616054  | 0.971631206 | Lachnospiraceae_incertae_sedis     |
| OTU_61  | 0.005439654 | 0.3891103    | 0.02 | Prevotella Cluster    | 0.32 | 0.08616054  | 3.758865248 | Streptococcus                      |
| OTU_62  | 1.38E-05    | 0.646827931  | 0.00 | Bacteroides Cluster 2 | 0.68 | 0.468688893 | 1.449804433 | Bacteroides                        |
| OTU_627 | 0.009443548 | 0.459016393  | 0.03 | Prevotella Cluster    | 0.00 | 0.005499609 | 0.555555556 | unclassified.Bacteroidetes         |
| OTU_63  | 0.003879261 | 0.40398503   | 0.01 | Firmicutes Cluster 1  | 0.06 | 0.062328901 | 1.029411765 | Lachnospiraceae_incertae_sedis     |
| OTU_639 | 0.000344524 | 0.553405736  | 0.00 | Prevotella Cluster    | 0.08 | 0.072717051 | 1.033613445 | Clostridium_XIVa                   |
| OTU_64  | 0.000130984 | 0.543640756  | 0.00 | Firmicutes Cluster 2  | 0.28 | 0.312866641 | 0.88671875  | Ruminococcus                       |
| OTU_65  | 3.40E-02    | 2.96E-01     | 0.07 | Firmicutes Cluster 2  | 0.09 | 0.304922761 | 0.29258517  | Flavonifractor                     |
| OTU_66  | 9.89E-05    | 0.551905784  | 0.00 | Firmicutes Cluster 2  | 0.53 | 0.789499413 | 0.673374613 | Coproccoccus                       |
| OTU_673 | 0.189894158 | 0.191369823  | 0.28 | Prevotella Cluster    | 0.06 | 0.033608721 | 1.745454545 | Lachnospiraceae_incertae_sedis     |
| OTU_678 | 0.836795743 | 0.034961127  | 0.87 | Bacteroides Cluster 1 | 0.00 | 0.01038815  | 0.411764706 | Clostridium_XIVa                   |
| OTU_68  | 7.97E-05    | 0.66470299   | 0.00 | Bacteroides Cluster 1 | 0.11 | 0.031775518 | 3.461538462 | Dialister                          |
| OTU_681 | 0.071647194 | 0.30192982   | 0.13 | Prevotella Cluster    | 0.01 | 0.031164451 | 0.196078431 | Veillonella                        |
| OTU_689 | 0.590284701 | 0.087708605  | 0.69 | Prevotella Cluster    | 0.03 | 0.007332812 | 3.916666667 | Clostridium_sensu_stricto          |
| OTU_69  | 0.002527399 | 0.472590636  | 0.01 | Prevotella Cluster    | 0.17 | 0.185764568 | 0.907894737 | unclassified.Ruminococcaceae       |
| OTU_7   | 2.61E-05    | 0.558498896  | 0.00 | Bacteroides Cluster 2 | 1.80 | 3.599188502 | 0.499660441 | Akkermansia                        |
| OTU_70  | 6.91E-05    | 0.585501455  | 0.00 | Bacteroides Cluster 2 | 0.18 | 0.273758311 | 0.658482143 | Clostridium_IV                     |
| OTU_702 | 0.029329624 | 0.313922635  | 0.06 | Bacteroides Cluster 1 | 0.15 | 0.157655456 | 0.976744186 | Clostridium_XIVa                   |
| OTU_71  | 6.73E-07    | 0.761906221  | 0.00 | Bacteroides Cluster 2 | 0.34 | 0.304311693 | 1.126506024 | Bacteroides                        |
| OTU_72  | 0.195695196 | 0.172236217  | 0.29 | Bacteroides Cluster 2 | 0.19 | 0.119158193 | 1.569230769 | Odoribacter                        |
| OTU_721 | 0.195545161 | -0.219455087 | 0.29 | Bacteroides Cluster 1 | 0.01 | 0.009166015 | 1.333333333 | Clostridium_XIVa                   |
| OTU_727 | 0.564631658 | -0.103448276 | 0.68 | Firmicutes Cluster 1  | 0.00 | 0.001833203 | 1           | unclassified.Lachnospiraceae       |
| OTU_731 | 0.329294855 | 0.123203545  | 0.44 | Firmicutes Cluster 1  | 0.54 | 0.827385608 | 0.652880355 | Blautia                            |
| OTU_738 | 0.011514855 | 0.36922321   | 0.03 | Firmicutes Cluster 1  | 0.08 | 0.110603246 | 0.745856354 | Lachnospiraceae_incertae_sedis     |
| OTU_74  | 0.077505222 | 0.290424556  | 0.14 | Pathogen Cluster      | 0.27 | 0.024442706 | 11.2        | Parvimonas                         |
| OTU_745 | 0.006841386 | 0.427281519  | 0.02 | Prevotella Cluster    | 0.10 | 0.191264177 | 0.504792332 | Erysipelotrichaceae_incertae_sedis |
| OTU_75  | 8.00E-06    | 0.579355822  | 0.00 | Bacteroides Cluster 2 | 0.70 | 0.38863903  | 1.801886792 | Barnesiella                        |
| OTU_751 | 0.193208478 | 0.203148367  | 0.29 | Firmicutes Cluster 1  | 0.01 | 0.030553383 | 0.34        | Lachnospiraceae_incertae_sedis     |
| OTU_755 | 0.427247194 | 0.121716124  | 0.54 | Firmicutes Cluster 1  | 0.02 | 0.040941533 | 0.432835821 | Lachnospiraceae_incertae_sedis     |
| OTU_76  | 0.00799471  | 0.370939885  | 0.02 | Bacteroides Cluster 2 | 0.24 | 0.147878373 | 1.615702479 | Clostridium_IV                     |
| OTU_761 | 0.000140753 | 0.603729969  | 0.00 | Firmicutes Cluster 1  | 0.05 | 0.042774736 | 1.057142857 | Lachnospiraceae_incertae_sedis     |
| OTU_77  | 0.014353222 | 0.32743443   | 0.04 | Bacteroides Cluster 1 | 0.13 | 0.08616054  | 1.460992908 | Bilophila                          |
| OTU_78  | 5.43E-05    | 0.675485122  | 0.00 | Pathogen Cluster      | 0.32 | 0.077605592 | 4.133858268 | Enterococcus                       |
| OTU_782 | 0.254757132 | 0.178752098  | 0.35 | Bacteroides Cluster 2 | 0.02 | 0.035441924 | 0.465517241 | Alistipes                          |
| OTU_784 | 0.114223944 | 0.26577699   | 0.19 | Prevotella Cluster    | 0.01 | 0.018943097 | 0.290322581 | unclassified.Clostridiales         |
| OTU_788 | 0.000676707 | 0.450440891  | 0.00 | Firmicutes Cluster 1  | 0.22 | 0.234038913 | 0.921671018 | Lachnospiraceae_incertae_sedis     |
| OTU_79  | 0.331894407 | 0.127576589  | 0.44 | Firmicutes Cluster 1  | 0.14 | 0.11488072  | 1.244680851 | Clostridium_XIVa                   |
| OTU_790 | 0.00253593  | 0.51446574   | 0.01 | Bacteroides Cluster 2 | 0.00 | 0.014054556 | 0.260869565 | Akkermansia                        |
| OTU_8   | 0.646561622 | 0.059138097  | 0.73 | Firmicutes Cluster 1  | 0.48 | 0.677062964 | 0.710288809 | Roseburia                          |
| OTU_802 | 0.000426493 | 0.441505824  | 0.00 | Firmicutes Cluster 1  | 1.84 | 1.715266914 | 1.071250445 | Faecalibacterium                   |
| OTU_809 | 0.860762123 | 0.026434187  | 0.89 | Firmicutes Cluster 1  | 0.01 | 0.089826946 | 0.163265306 | Lachnospiraceae_incertae_sedis     |
| OTU_81  | 0.036946278 | 0.280407241  | 0.08 | Firmicutes Cluster 1  | 0.10 | 0.197374853 | 0.501547988 | unclassified.Ruminococcaceae       |
| OTU_82  | 0.000188952 | 0.592245487  | 0.00 | Prevotella Cluster    | 0.45 | 0.758334963 | 0.591458501 | Prevotella                         |

|         |             |              |      |                       |             |             |             |                                |
|---------|-------------|--------------|------|-----------------------|-------------|-------------|-------------|--------------------------------|
| OTU_822 | 0.443434543 | -0.132499735 | 0.55 | Prevotella Cluster    | 0.00        | 0.008554947 | 0.285714286 | Flavonifractor                 |
| OTU_83  | 0.088966644 | 0.226191327  | 0.16 | Firmicutes Cluster 2  | 0.25        | 0.353197106 | 0.693771626 | Lachnospiraceae_incertae_sedis |
| OTU_830 | 0.913389972 | 0.017948773  | 0.94 | Firmicutes Cluster 2  | 0.01        | 0.022609503 | 0.27027027  | Lachnospiraceae_incertae_sedis |
| OTU_837 | 0.253886852 | 0.16953753   | 0.35 | Firmicutes Cluster 1  | 0.04        | 0.083716269 | 0.532846715 | unclassified.Lachnospiraceae   |
| OTU_84  | 7.04E-05    | 0.638899124  | 0.00 | Prevotella Cluster    | 0.05        | 0.188819906 | 0.239482201 | unclassified.Clostridiales     |
| OTU_843 | 0.05290069  | 0.319866529  | 0.10 | Prevotella Cluster    | 0.03        | 0.091049081 | 0.342281879 | Prevotella                     |
| OTU_856 | 0.001822708 | 0.438196677  | 0.01 | Firmicutes Cluster 1  | 0.19        | 0.248704537 | 0.776412776 | Bacteroides                    |
| OTU_86  | 6.76E-05    | 0.64671795   | 0.00 | Bacteroides Cluster 1 | 0.02        | 0.017720962 | 1.206896552 | unclassified.Rhodospirillaceae |
| OTU_869 | 0.632989532 | -0.083389653 | 0.73 | Prevotella Cluster    | 0.01        | 0.001222135 | 9           | Actinomyces                    |
| OTU_87  | 0.000294743 | 0.597938144  | 0.00 | Bacteroides Cluster 2 | 0.09        | 0.046441142 | 1.921052632 | Alistipes                      |
| OTU_877 | 0.631885133 | 0.076196063  | 0.73 | Prevotella Cluster    | 0.02        | 0.009777083 | 2.25        | Lachnospiraceae_incertae_sedis |
| OTU_88  | 0.000924593 | 0.516295956  | 0.00 | Bacteroides Cluster 1 | 0.04        | 0.055607157 | 0.681318681 | Barnesiella                    |
| OTU_884 | 1.15E-01    | 0.23450334   | 0.19 | Firmicutes Cluster 2  | 0.04        | 0.055607157 | 0.725274725 | unclassified.Ruminococcaceae   |
| OTU_888 | 0.614274784 | 0.083321762  | 0.71 | Bacteroides Cluster 1 | 0.01        | 0.021387368 | 0.342857143 | Lachnospiraceae_incertae_sedis |
| OTU_89  | 0.163399161 | 0.231709369  | 0.25 | Pathogen Cluster      | 0.22        | 0.00794388  | 28.15384615 | Streptococcus                  |
| OTU_9   | 0.014198498 | 0.333164673  | 0.04 | Pathogen Cluster      | 1.32        | 0.288423934 | 4.593220339 | Bacteroides                    |
| OTU_92  | 0.005866875 | 0.396783508  | 0.02 | Firmicutes Cluster 2  | 0.10        | 0.118547126 | 0.824742268 | unclassified.Ruminococcaceae   |
| OTU_922 | 0.963495932 | 0.007253808  | 0.98 | Firmicutes Cluster 1  | 0.01        | 0.027498045 | 0.311111111 | Lachnospiraceae_incertae_sedis |
| OTU_930 | 0.643854035 | -0.072534641 | 0.73 | Firmicutes Cluster 1  | 0.02        | 0.035441924 | 0.448275862 | unclassified.Lachnospiraceae   |
| OTU_94  | 0.001305542 | 0.425302167  | 0.01 | Bacteroides Cluster 2 | 0.15        | 0.097770825 | 1.54375     | Collinsella                    |
| OTU_949 | 0.13808909  | 0.234560764  | 0.22 | Firmicutes Cluster 1  | 0.02        | 0.109992178 | 0.155555556 | Bacteroides                    |
| OTU_96  | 0.02758643  | 0.322941514  | 0.06 | Prevotella Cluster    | 0.13        | 0.274369378 | 0.481069042 | Acetanaerobacterium            |
| OTU_960 | 0.294817916 | 0.135449811  | 0.40 | Firmicutes Cluster 1  | 0.23        | 0.411859601 | 0.557863501 | unclassified.Lachnospiraceae   |
| OTU_962 | 0.001099578 | 0.497090135  | 0.01 | Prevotella Cluster    | 0.04        | 0.143600899 | 0.30212766  | Lachnospiraceae_incertae_sedis |
| OTU_968 | 0.16699084  | 0.18147671   | 0.26 | Firmicutes Cluster 1  | 0.13        | 0.249315604 | 0.50245098  | Clostridium_XIVa               |
| OTU_969 | 0.425569385 | 0.134490192  | 0.54 | Prevotella Cluster    | 0.01        | 0.005499609 | 2.444444444 | Clostridium_IV                 |
| OTU_97  | 0.01427565  | 0.33926477   | 0.04 | Prevotella Cluster    | 0.12        | 0.123435667 | 1.004950495 | Flavonifractor                 |
| OTU_972 | 0.169847399 | 0.239045722  | 0.26 | Firmicutes Cluster 1  | 0.00        | 0.00794388  | 0.384615385 | Coprococcus                    |
| OTU_98  | 4.46E-06    | 0.776653352  | 0.00 | Firmicutes Cluster 2  | 0.09        | 0.064773172 | 1.462264151 | Ruminococcus                   |
| OTU_988 | 0.4853091   | 0.097330804  | 0.59 | Firmicutes Cluster 1  | 0.05        | 0.112436449 | 0.451086957 | Dorea                          |
| OTU_989 | 0.481741941 | 0.118081985  | 0.59 | Firmicutes Cluster 1  | 0.00        | 0.016498827 | 0.185185185 | Lachnospiraceae_incertae_sedis |
| OTU_99  | 0.010345649 | 0.363115024  | 0.03 | Firmicutes Cluster 1  | 0.03        | 0.089826946 | 0.360544218 | unclassified.Lachnospiraceae   |
| OTU_997 | 0.371783931 | 0.138522417  | 0.49 | Firmicutes Cluster 2  | 0.010999218 | 0.066606375 | 0.165137615 | Oscillibacter                  |
| OTU_998 | 0.017558315 | 0.376821488  | 0.04 | Firmicutes Cluster 1  | 0.028109112 | 0.017720962 | 1.586206897 | Oscillibacter                  |
