# Supplementary material
Source: HighWire-hosted journal article supplement (https://gut.bmj.com/content/66/4/633)
Supplement: inline-supplementary-material-12 [file inline-supplementary-material-12.pdf]

Supplementary table 12: Spearman rank correlation between the expression of genes and the abundance of CAGs only in non-cancerous tissue of individuals with CRC (OFF samples)

|                                | p-value (not adjusted) | Spearman Correlation Coefficient |
|--------------------------------|------------------------|----------------------------------|
| Bacteroidetes Cluster 1_CCL20  | 0.877158776            | 0.039235937                      |
| Bacteroidetes Cluster 1_CD14   | 0.77877145             | -0.071244202                     |
| Bacteroidetes Cluster 1_CXCL1  | 0.531268606            | 0.157976273                      |
| Bacteroidetes Cluster 1_CXCL11 | 0.034276026            | 0.50077446                       |
| Bacteroidetes Cluster 1_IFNG   | 0.729123916            | 0.087764596                      |
| Bacteroidetes Cluster 1_IL10   | 0.810233644            | -0.060918955                     |
| Bacteroidetes Cluster 1_IL17a  | 0.178219329            | 0.466666667                      |
| Bacteroidetes Cluster 1_IL1b   | 0.653624736            | 0.113577713                      |
| Bacteroidetes Cluster 1_IL23   | 0.698593813            | -0.098089843                     |
| Bacteroidetes Cluster 1_IL6    | 0.959663761            | 0.014298486                      |
| Bacteroidetes Cluster 1_IL8    | 0.606881896            | 0.130098107                      |
| Bacteroidetes Cluster 1_MMP13  | 0.732886836            | 0.127272727                      |
| Bacteroidetes Cluster 1_MyC    | 0.550450551            | -0.1507486                       |
| Bacteroidetes Cluster 1_REG4   | 0.701627962            | 0.097057318                      |
| Bacteroidetes Cluster 1_SERP1  | 0.174808801            | -0.33453799                      |
| Bacteroidetes Cluster 1_STAT3  | 0.818809784            | -0.060085848                     |
| Bacteroidetes Cluster 1_TLR2   | 0.88358133             | -0.037170888                     |
| Bacteroidetes Cluster 1_TLR4   | 0.533990019            | -0.156943748                     |
| Bacteroidetes Cluster 2_CCL20  | 0.947545763            | 0.01754386                       |
| Bacteroidetes Cluster 2_CD14   | 0.574681698            | 0.141382869                      |
| Bacteroidetes Cluster 2_CXCL1  | 0.973759651            | -0.009287926                     |
| Bacteroidetes Cluster 2_CXCL11 | 0.574681698            | 0.141382869                      |
| Bacteroidetes Cluster 2_IFNG   | 0.215529076            | -0.306501548                     |
| Bacteroidetes Cluster 2_IL10   | 0.318276514            | -0.24871001                      |
| Bacteroidetes Cluster 2_IL17a  | 0.312800267            | -0.357575758                     |
| Bacteroidetes Cluster 2_IL1b   | 0.921384723            | -0.025799794                     |
| Bacteroidetes Cluster 2_IL23   | 0.318276514            | -0.24871001                      |
| Bacteroidetes Cluster 2_IL6    | 0.490099813            | 0.192857143                      |
| Bacteroidetes Cluster 2_IL8    | 0.973759651            | 0.009287926                      |
| Bacteroidetes Cluster 2_MMP13  | 0.607566897            | -0.187878788                     |
| Bacteroidetes Cluster 2_MyC    | 0.154950061            | -0.349845201                     |
| Bacteroidetes Cluster 2_REG4   | 0.497889796            | 0.170278638                      |
| Bacteroidetes Cluster 2_SERP1  | 0.662278717            | -0.110423117                     |
| Bacteroidetes Cluster 2_STAT3  | 0.03180662             | -0.526960784                     |
| Bacteroidetes Cluster 2_TLR2   | 0.82419663             | 0.056759546                      |
| Bacteroidetes Cluster 2_TLR4   | 0.446349533            | -0.190918473                     |

|                                    |             |              |
|------------------------------------|-------------|--------------|
| <b>Firmicutes Cluster 1_CCL20</b>  | 0.263703718 | -0.277605779 |
| <b>Firmicutes Cluster 1_CD14</b>   | 0.862851182 | 0.044375645  |
| <b>Firmicutes Cluster 1_CXCL1</b>  | 0.980318291 | -0.007223942 |
| <b>Firmicutes Cluster 1_CXCL11</b> | 0.609108914 | -0.128998968 |
| <b>Firmicutes Cluster 1_IFNG</b>   | 1           | -0.001031992 |
| <b>Firmicutes Cluster 1_IL10</b>   | 0.830613988 | 0.054695562  |
| <b>Firmicutes Cluster 1_IL17a</b>  | 0.707203786 | -0.139393939 |
| <b>Firmicutes Cluster 1_IL1b</b>   | 0.519298577 | -0.162022704 |
| <b>Firmicutes Cluster 1_IL23</b>   | 0.954095309 | -0.015479876 |
| <b>Firmicutes Cluster 1_IL6</b>    | 0.389234503 | 0.239285714  |
| <b>Firmicutes Cluster 1_IL8</b>    | 0.760687928 | -0.077399381 |
| <b>Firmicutes Cluster 1_MMMP13</b> | 0.312800267 | -0.357575758 |
| <b>Firmicutes Cluster 1_MyC</b>    | 0.644362238 | -0.116615067 |
| <b>Firmicutes Cluster 1_REG4</b>   | 0.698648867 | 0.098039216  |
| <b>Firmicutes Cluster 1_SERP1</b>  | 0.754411858 | -0.079463364 |
| <b>Firmicutes Cluster 1_STAT3</b>  | 0.701339321 | -0.100490196 |
| <b>Firmicutes Cluster 1_TLR2</b>   | 0.471758486 | -0.180598555 |
| <b>Firmicutes Cluster 1_TLR4</b>   | 0.638431995 | -0.118679051 |
| <b>Firmicutes Cluster 2_CCL20</b>  | 0.530166211 | -0.157894737 |
| <b>Firmicutes Cluster 2_CD14</b>   | 0.318276514 | -0.24871001  |
| <b>Firmicutes Cluster 2_CXCL1</b>  | 0.947545763 | 0.01754386   |
| <b>Firmicutes Cluster 2_CXCL11</b> | 0.446349533 | -0.190918473 |
| <b>Firmicutes Cluster 2_IFNG</b>   | 0.856385    | 0.046439628  |
| <b>Firmicutes Cluster 2_IL10</b>   | 0.773283851 | -0.073271414 |
| <b>Firmicutes Cluster 2_IL17a</b>  | 0.330549466 | -0.345454545 |
| <b>Firmicutes Cluster 2_IL1b</b>   | 0.921384723 | 0.025799794  |
| <b>Firmicutes Cluster 2_IL23</b>   | 0.754411858 | -0.079463364 |
| <b>Firmicutes Cluster 2_IL6</b>    | 0.743453593 | 0.092857143  |
| <b>Firmicutes Cluster 2_IL8</b>    | 0.875808883 | -0.040247678 |
| <b>Firmicutes Cluster 2_MMMP13</b> | 0.864753529 | -0.066666667 |
| <b>Firmicutes Cluster 2_MyC</b>    | 0.609108914 | -0.128998968 |
| <b>Firmicutes Cluster 2_REG4</b>   | 0.704776371 | -0.095975232 |
| <b>Firmicutes Cluster 2_SERP1</b>  | 0.94099952  | 0.019607843  |
| <b>Firmicutes Cluster 2_STAT3</b>  | 0.802055628 | -0.066176471 |
| <b>Firmicutes Cluster 2_TLR2</b>   | 0.580359605 | -0.139318885 |
| <b>Firmicutes Cluster 2_TLR4</b>   | 0.741905326 | -0.083591331 |
| <b>Pathogen Cluster_CCL20</b>      | 0.035400021 | 0.502579979  |
| <b>Pathogen Cluster_CD14</b>       | 0.508539186 | -0.166150671 |
| <b>Pathogen Cluster_CXCL1</b>      | 0.152402405 | 0.351909185  |

|                                  |             |              |
|----------------------------------|-------------|--------------|
| <b>Pathogen Cluster_CXCL11</b>   | 0.084041953 | 0.42002064   |
| <b>Pathogen Cluster_IFNG</b>     | 0.574681698 | 0.141382869  |
| <b>Pathogen Cluster_IL10</b>     | 0.431460055 | 0.197110423  |
| <b>Pathogen Cluster_IL17a</b>    | 0.218028475 | 0.43030303   |
| <b>Pathogen Cluster_IL1b</b>     | 0.089076103 | 0.413828689  |
| <b>Pathogen Cluster_IL23</b>     | 0.170867036 | 0.3374613    |
| <b>Pathogen Cluster_IL6</b>      | 0.532030437 | 0.175        |
| <b>Pathogen Cluster_IL8</b>      | 0.096133309 | 0.405572755  |
| <b>Pathogen Cluster_MMMP13</b>   | 0.087768043 | 0.575757576  |
| <b>Pathogen Cluster_MyC</b>      | 0.133077875 | 0.368421053  |
| <b>Pathogen Cluster_REG4</b>     | 0.407250952 | 0.207430341  |
| <b>Pathogen Cluster_SERP1</b>    | 0.365632628 | 0.226006192  |
| <b>Pathogen Cluster_STAT3</b>    | 0.449236656 | 0.196078431  |
| <b>Pathogen Cluster_TLR2</b>     | 0.074616075 | 0.432404541  |
| <b>Pathogen Cluster_TLR4</b>     | 0.4025014   | 0.209494324  |
| <b>Prevotella Cluster_CCL20</b>  | 0.993438879 | 0.003095975  |
| <b>Prevotella Cluster_CD14</b>   | 0.393095592 | 0.213622291  |
| <b>Prevotella Cluster_CXCL1</b>  | 0.456424978 | -0.186790506 |
| <b>Prevotella Cluster_CXCL11</b> | 0.895302775 | -0.034055728 |
| <b>Prevotella Cluster_IFNG</b>   | 0.557796725 | 0.147574819  |
| <b>Prevotella Cluster_IL10</b>   | 0.51390524  | -0.164086687 |
| <b>Prevotella Cluster_IL17a</b>  | 0.891638844 | 0.054545455  |
| <b>Prevotella Cluster_IL1b</b>   | 0.609108914 | -0.128998968 |
| <b>Prevotella Cluster_IL23</b>   | 0.717084758 | -0.091847265 |
| <b>Prevotella Cluster_IL6</b>    | 0.307424937 | -0.282142857 |
| <b>Prevotella Cluster_IL8</b>    | 0.656285912 | -0.1124871   |
| <b>Prevotella Cluster_MMMP13</b> | 0.448272159 | -0.272727273 |
| <b>Prevotella Cluster_MyC</b>    | 0.431460055 | 0.197110423  |
| <b>Prevotella Cluster_REG4</b>   | 0.365632628 | -0.226006192 |
| <b>Prevotella Cluster_SERP1</b>  | 0.94099952  | -0.019607843 |
| <b>Prevotella Cluster_STAT3</b>  | 0.920926977 | -0.026960784 |
| <b>Prevotella Cluster_TLR2</b>   | 0.298049947 | -0.259029928 |
| <b>Prevotella Cluster_TLR4</b>   | 0.62077132  | -0.124871001 |
